# Supplementary material
Source: PubMed Central journal article supplement (PMC9937641)
Supplement: NIHMS1853325-supplement-1.pdf [file NIHMS1853325-supplement-1.pdf]

Supplemental Table 1: ROI measurements

| <b>Specimen</b> | <b>Avg ROI Diameter (<math>\mu\text{m}</math>)</b> | <b>Avg Nuclei Count</b> |
|-----------------|----------------------------------------------------|-------------------------|
| HGG03           | 490                                                | 1214/ROI                |
| HGG05           | 414.05                                             | 1380/ROI                |
| HGG06           | 539.38                                             | 1375/ROI                |

Supplemental Table 2: Neuropathological assessment of individual ROIs

| Sample ID | ROI    | Tumor Cellularity (high, medium, low) | Necrosis | Pseudopalisading cells | MVP | Blood vessels - No MVP |
|-----------|--------|---------------------------------------|----------|------------------------|-----|------------------------|
| HGG_03    | ROI 1  | >95% tumor (medium)                   | 0%       | 0%                     | 0%  | <5%                    |
| HGG_03    | ROI 2  | 95% tumor (low -medium)               | 0%       | 0%                     | 0%  | 5%                     |
| HGG_03    | ROI 3  | 100% tumor (medium)                   | 0%       | 0%                     | 0%  | 0%                     |
| HGG_03    | ROI 4  | 100% tumor (low-medium)               | 0%       | 0%                     | 0%  | 0%                     |
| HGG_03    | ROI 5  | 100% tumor (low -medium)              | 0%       | 0%                     | 0%  | <5%                    |
| HGG_03    | ROI 6  | 100% tumor (medium)                   | 0%       | 0%                     | 0%  | <5%                    |
| HGG_03    | ROI 7  | 100% tumor (medium)                   | 0%       | 0%                     | 0%  | <5%                    |
| HGG_03    | ROI 8  | 90% (Medium-high)                     | <5%      | 0%                     | 10% | <5%                    |
| HGG_03    | ROI 9  | 100% tumor (low-medium)               | 0%       | 0%                     | 0%  | 0%                     |
| HGG_03    | ROI 10 | 5%                                    | 0%       | 0%                     | 0%  | 95%                    |
| HGG_03    | ROI 11 | 95% tumor (low -medium)               | 0%       | 0%                     | 0%  | 5%                     |
| HGG_03    | ROI 12 | 30-40% tumor (low -medium)            | <5%      | 0%                     | 0%  | 60%                    |
| HGG_03    | ROI 13 | 100% tumor (medium)                   | 0%       | 0%                     | 0%  | 0%                     |
| HGG_03    | ROI 14 | 100% tumor (medium)                   | 0%       | 0%                     | 0%  | 0%                     |
| HGG_03    | ROI 15 | 100% tumor (medium)                   | 0%       | 0%                     | 0%  | 0%                     |
| HGG_03    | ROI 16 | 10% tumor (medium)                    | 90%      | 0%                     | 0%  | 0%                     |
| HGG_03    | ROI 17 | 0%                                    | 100%     | 0%                     | 0%  | 0%                     |
| HGG_03    | ROI 18 | 0%                                    | 100%     | 0%                     | 0%  | 0%                     |
| HGG_03    | ROI 19 | 0%                                    | 0%       | 0%                     | 0%  | 100%                   |
| HGG_03    | ROI 20 | 45%                                   | 50%      | <5%                    | 0%  | 5%                     |
| HGG_03    | ROI 21 | 50%                                   | <5%      | 0%                     | 0%  | 50%                    |
| HGG_03    | ROI 22 | 80%                                   | 5%       | 0%                     | <5% | 5-10%                  |
| HGG_03    | ROI 23 | See other                             | 30%      | 0%                     | 0%  | 10%                    |
| HGG_03    | ROI 24 | See other                             | 75%      | 0%                     | 0%  | 0%                     |
| HGG_03    | ROI 25 | 80-90% tumor (medium)                 | 0%       | 0%                     | 0%  | 0%                     |
| HGG_03    | ROI 26 | 75% tumor (medium)                    | 25%      | 0%                     | 0%  | 0%                     |
| HGG_03    | ROI 27 | 80-90% tumor (medium)                 | 0%       | 0%                     | 0%  | <5%                    |
| HGG_03    | ROI 28 | 90-95% tumor (medium)                 | 0%       | 0%                     | 0%  | 5-10%                  |
| HGG_03    | ROI 29 | See other                             | 75%      | 0%                     | 0%  | 0%                     |
| HGG_03    | ROI 30 | See other                             | 30%      | 0%                     | 0%  | 30%                    |
| HGG_03    | ROI 31 | 0%                                    | 100%     | 0%                     | 0%  | 0%                     |
| HGG_03    | ROI 32 | 0%                                    | 100%     | 0%                     | 0%  | 0%                     |
| HGG_05    | ROI 1  | 100% tumor (high)                     | 0%       | 0%                     | 0%  | 0%                     |
| HGG_05    | ROI 2  | 100% tumor (high)                     | 0%       | 0%                     | 0%  | 0%                     |
| HGG_05    | ROI 3  | 100% tumor (high)                     | 0%       | 0%                     | 0%  | 0%                     |
| HGG_05    | ROI 4  | 100% tumor (high)                     | 0%       | 0%                     | 0%  | 0%                     |
| HGG_05    | ROI 5  | 100% tumor (high)                     | 0%       | 0%                     | 0%  | 0%                     |
| HGG_05    | ROI 6  | 90% tumor (low-medium)                | 0%       | 0%                     | 5%  | 5%                     |
| HGG_05    | ROI 7  | 90% tumor (high)                      | 0%       | 0%                     | 5%  | 5%                     |
| HGG_05    | ROI 8  | 50% tumor (high)                      | 0%       | 0%                     | 50% | 0%                     |
| HGG_05    | ROI 9  | 90% tumor (low-medium)                | 0%       | 10%                    | 0%  | 0%                     |
| HGG_05    | ROI 10 | 95% tumor (high)                      | 0%       | 0%                     | 0%  | <5%                    |

|        |        |                          |           |     |     |     |
|--------|--------|--------------------------|-----------|-----|-----|-----|
| HGG_05 | ROI 11 | 95% tumor (high)         | 0%        | 0%  | 0%  | 5%  |
| HGG_05 | ROI 12 | 95% tumor (high)         | 0%        | 0%  | 0%  | 5%  |
| HGG_05 | ROI 13 | 60% tumor (high)         | 0%        | 0%  | 40% | 0%  |
| HGG_05 | ROI 14 | 90% tumor (high)         | 0%        | 0%  | 10% | 0%  |
| HGG_05 | ROI 15 | 95% tumor (medium-high)  | 0%        | 0%  | 5%  | 0%  |
| HGG_05 | ROI 16 | 40% tumor (high)         | 0%        | 0%  | 60% | 0%  |
| HGG_05 | ROI 17 | 20% tumor (medium)       | 0%        | 0%  | 80% | 0%  |
| HGG_05 | ROI 18 | 75% (low-high)           | 0%        | 0%  | 15% | 10% |
| HGG_05 | ROI 19 | 75% (low-high)           | 0%        | 0%  | 15% | 10% |
| HGG_05 | ROI 20 | See other                | See other | 0%  | 0%  | 5%  |
| HGG_05 | ROI 21 | See other                | See other | 0%  | 0%  | 75% |
| HGG_05 | ROI 22 | 95% tumor (medium-high)  | 0%        | 0%  | 0%  | <5% |
| HGG_05 | ROI 23 | 100% tumor (medium-high) | 0%        | 0%  | 0%  | <5% |
| HGG_05 | ROI 24 | 95% tumor (high)         | 0%        | 0%  | 0%  | 5%  |
| HGG_05 | ROI 25 | 40% tumor (high)         | 0%        | 0%  | 60% | 0%  |
| HGG_05 | ROI 26 | 10% tumor (high)         | 45%       | 35% | 10% | 0%  |
| HGG_05 | ROI 27 | 30% tumor (high)         | 0%        | 0%  | 0%  | 10% |
| HGG_05 | ROI 28 | 50% tumor (high)         | 0%        | 0%  | 0%  | 0%  |
| HGG_05 | ROI 29 | 60% tumor (high)         | 0%        | 0%  | 40% | 0%  |
| HGG_05 | ROI 30 | 33% tumor (high)         | 0%        | 0%  | 33% | 0%  |
| HGG_05 | ROI 31 | 50% tumor (high)         | 0%        | 0%  | 50% | 0%  |
| HGG_05 | ROI 32 | 30% tumor (medium-high)  | 0%        | 0%  | 70% | 0%  |
| HGG_06 | ROI 1  | 100% tumor (high)        | 0%        | 0%  | 0%  | 0%  |
| HGG_06 | ROI 2  | 100% tumor (high)        | 0%        | 0%  | 0%  | 0%  |
| HGG_06 | ROI 3  | 90% tumor (high)         | 5%        | 5%  | 0%  | 0%  |
| HGG_06 | ROI 4  | 85% tumor (high)         | 5%        | 5%  | 0%  | 5%  |
| HGG_06 | ROI 5  | 85% tumor (high)         | 5%        | 5%  | 0%  | 5%  |
| HGG_06 | ROI 6  | 95% tumor (medium)       | 0%        | 0%  | 0%  | 5%  |
| HGG_06 | ROI 7  | 70% tumor (high)         | 5%        | 5%  | 30% | 0%  |
| HGG_06 | ROI 8  | 70% tumor (high)         | 5%        | 5%  | 30% | 0%  |
| HGG_06 | ROI 9  | >95% tumor (high)        | 0%        | 0%  | 0%  | <5% |
| HGG_06 | ROI 10 | 95% tumor (medium)       | 0%        | 0%  | 0%  | 5%  |
| HGG_06 | ROI 11 | >95% tumor (medium-high) | 0%        | 0%  | 0%  | <5% |
| HGG_06 | ROI 12 | 20% tumor (low)          | 0%        | 0%  | 0%  | 80% |
| HGG_06 | ROI 13 | 100% tumor (medium)      | 0%        | 0%  | 0%  | 0%  |
| HGG_06 | ROI 14 | 90% tumor (low)          | 0%        | 0%  | 0%  | 10% |
| HGG_06 | ROI 15 | 90% tumor (medium)       | 0%        | 0%  | 5%  | 5%  |
| HGG_06 | ROI 16 | >95% tumor (low)         | 0%        | 0%  | 0%  | <5% |
| HGG_06 | ROI 17 | >95% tumor (low)         | 0%        | 0%  | 0%  | <5% |
| HGG_06 | ROI 18 | >95% tumor (low-medium)  | 0%        | 0%  | 0%  | <5% |
| HGG_06 | ROI 19 | 95% tumor (medium)       | 0%        | 0%  | 0%  | 5%  |
| HGG_06 | ROI 20 | >95% tumor (medium)      | 0%        | 0%  | 0%  | <5% |
| HGG_06 | ROI 21 | 10-20% tumor (low)       | 80-90%    | 0%  | 0%  | 0%  |
| HGG_06 | ROI 22 | 50% tumor (medium)       | 0%        | 0%  | 50% | 0%  |
| HGG_06 | ROI 23 | 70% tumor (low-medium)   | 0%        | 0%  | 30% | 0%  |
| HGG_06 | ROI 24 | 50% tumor (medium)       | 0%        | 0%  | 0%  | 50% |

|        |        |                         |    |    |     |     |
|--------|--------|-------------------------|----|----|-----|-----|
| HGG_06 | ROI 25 | 95% tumor (medium-high) | 0% | 0% | 0%  | 5%  |
| HGG_06 | ROI 26 | 95% tumor (medium)      | 0% | 0% | 0%  | 5%  |
| HGG_06 | ROI 27 | 80% tumor (medium)      | 0% | 0% | 20% | 0%  |
| HGG_06 | ROI 28 | 95% tumor (low-medium)  | 0% | 0% | 0%  | 5%  |
| HGG_06 | ROI 29 | 95% tumor (medium)      | 0% | 0% | 0%  | 5%  |
| HGG_06 | ROI 30 | >95% tumor (medium)     | 0% | 0% | 0%  | <5% |
| HGG_06 | ROI 31 | >95% tumor (medium)     | 0% | 0% | 0%  | <5% |
| HGG_06 | ROI 32 | >95% tumor (medium)     | 0% | 0% | 0%  | <5% |

Supplemental Table 3: Correlation between neuropathology assessment and SpatialDecon cell type scores

| <u>Neuropath. Tumor Cellularity vs SpatialDecon Neoplastic Cell Score</u>                         | <u>Spearman</u> | <u>p-value</u> |
|---------------------------------------------------------------------------------------------------|-----------------|----------------|
| HGG03                                                                                             | <b>0.659</b>    | <b>0.0009</b>  |
| HGG05                                                                                             | <b>0.6642</b>   | <b>0.0002</b>  |
| HGG06                                                                                             | 0.3735          | 0.055          |
| <u>Neuropath. Microvascular Proliferation vs SpatialDecon Vascular Cell Score</u>                 | <u>Spearman</u> | <u>p-value</u> |
| HGG03                                                                                             | 0.07881         | 0.7208         |
| HGG05                                                                                             | <b>0.5641</b>   | <b>0.0014</b>  |
| HGG06                                                                                             | <b>0.5852</b>   | <b>0.0013</b>  |
| <u>Neuropath. Vessels without Microvascular Proliferation vs SpatialDecon Vascular Cell Score</u> | <u>Spearman</u> | <u>p-value</u> |
| HGG03                                                                                             | <b>0.7053</b>   | <b>0.0002</b>  |
| HGG05                                                                                             | 0.1218          | 0.537          |
| HGG06                                                                                             | -0.2914         | 0.1403         |

Supplemental Figure 1:

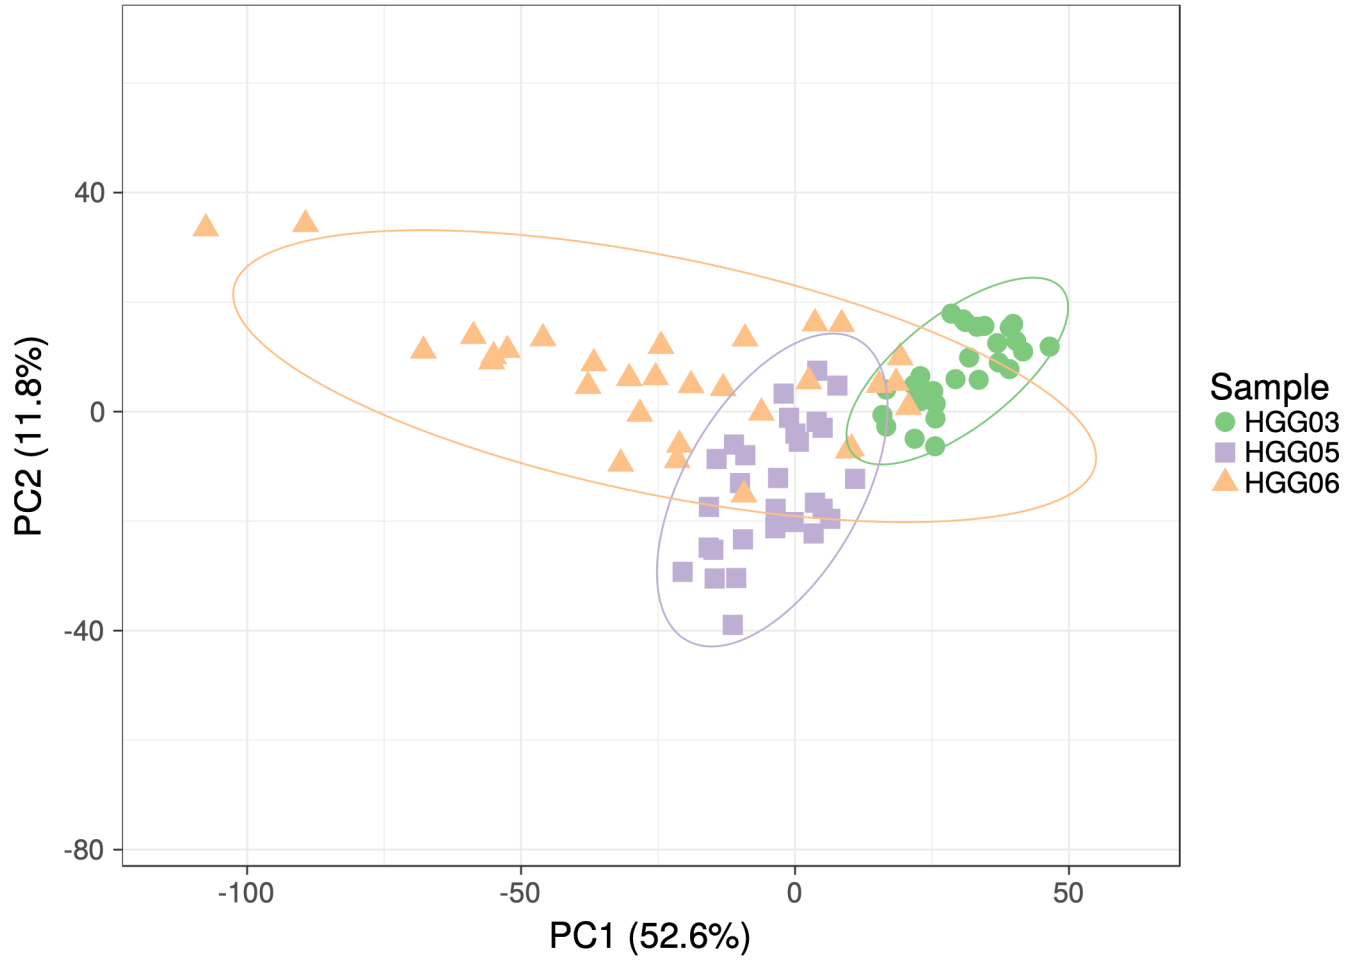

**Supplemental Figure 1: Intertumoral heterogeneity in glioblastoma specimens.** PCA of the ROIs from specimens HGG03 (green circles), HGG05 (purple squares), and HGG06 (orange triangles). Ellipses represent the 95% confidence interval.

# Supplemental Figure 2:

**A:**

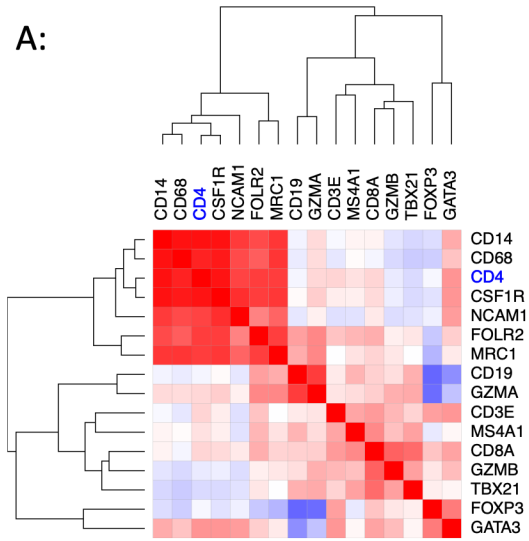

**B:**

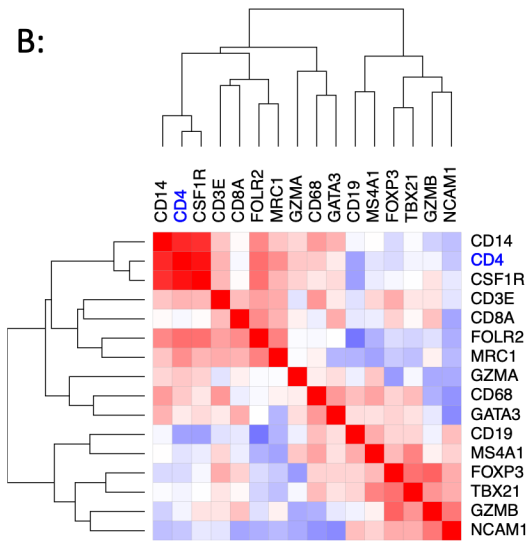

**C:**

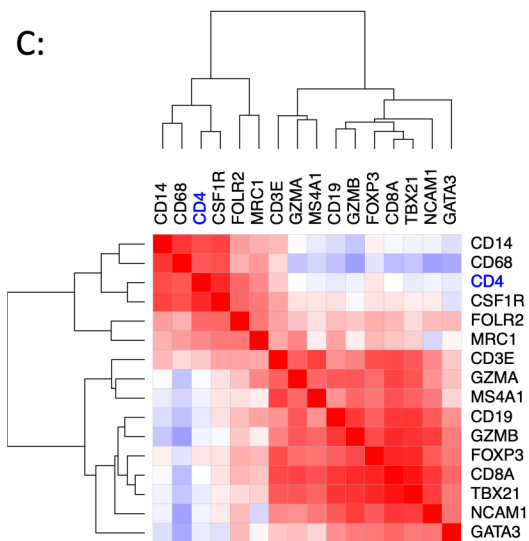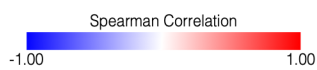



**Supplemental Figure 2: Correlation analysis of immune cell markers.** Spearman correlation of lymphocyte and myeloid cell marker gene expression in specimen (A) HGG03, (B) HGG05, and (C) HGG06. Color bar indicates Spearman's rho.

Supplemental Figure 3:

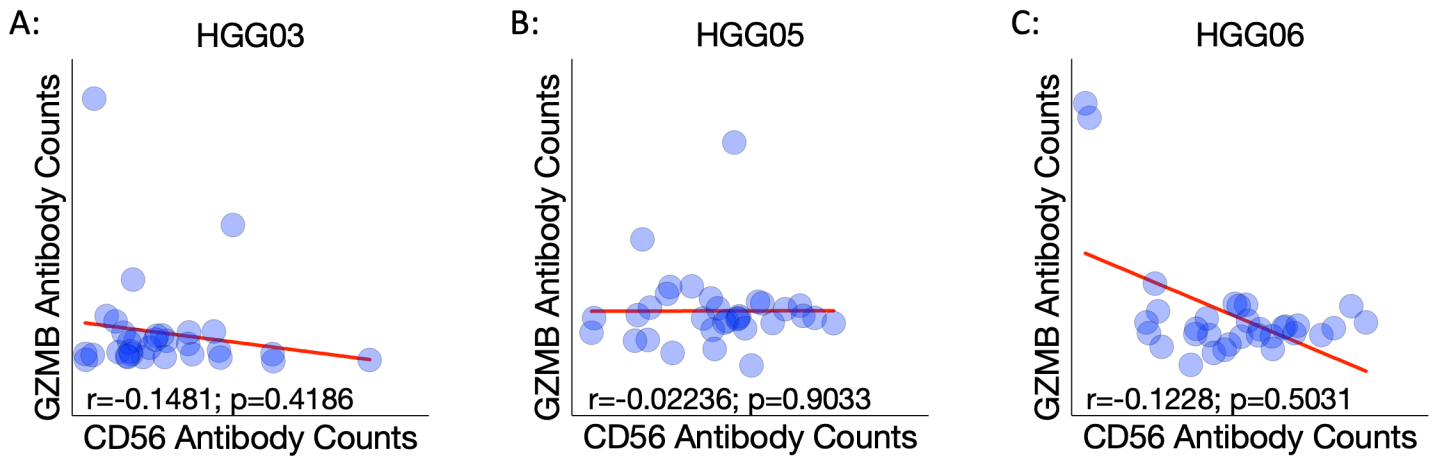

**Supplemental Figure 3: Correlation between granzyme B and CD56 protein expression.**

Spearman correlations between granzyme B and CD56 antibody counts in specimens (A), HGG03, (B) HGG05 and (C) HGG06. Correlation and significance values are listed along the X-axis of each scatter plot.  $p < 0.05$  is considered statistically significant.



**Supplemental Figure 4: Biological pathways associated with VEGFA expression.** Heatmaps showing the results of nearest neighbors analysis using the biological processes from the Reactome database for specimens (A) HGG05 and (B) HGG06. Color bar indicates z-score.

# Supplemental Figure 5:

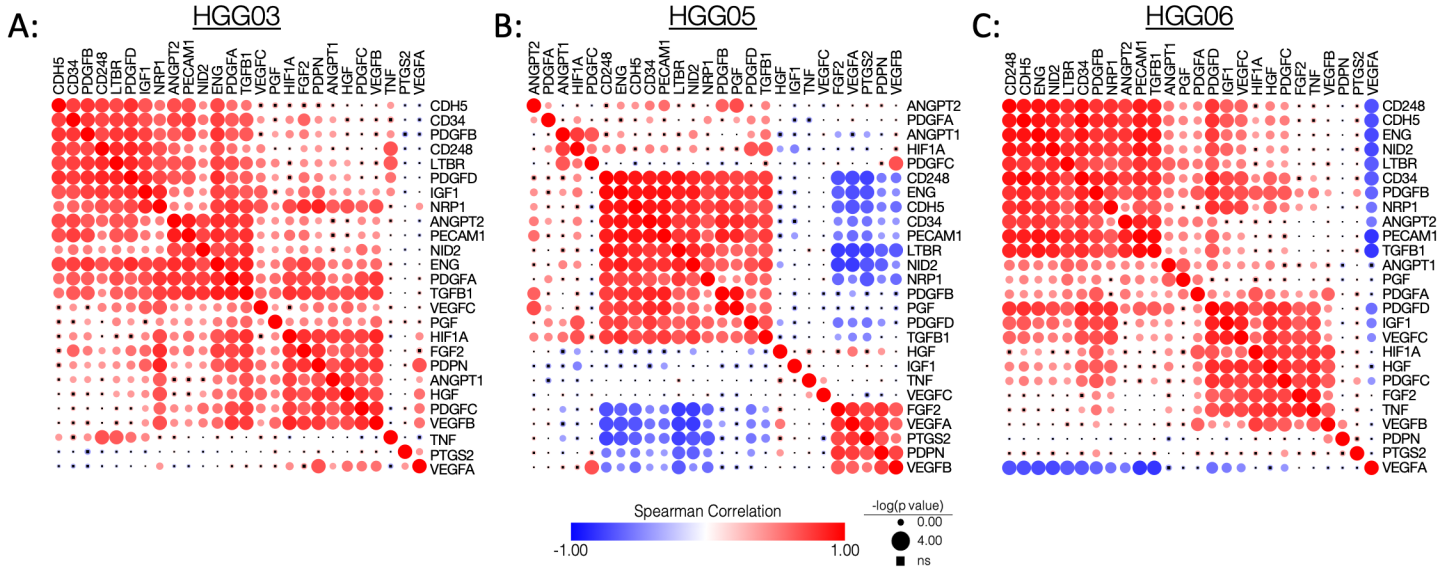

**Supplemental Figure 5: Correlation between vascular markers and angiogenic mediators.**

Spearman correlation matrices showing the relationships between the normalized gene counts of known pro-angiogenic genes and vascular marker genes in tumor specimens (A) HGG03, (B) HGG05, and (C) HGG06. Circle size indicates p value where circles with inlaid black squares indicating failure to reach statistical significance ( $p < 0.05$ ). Color bar indicates Spearman's rho.
